# Supplementary material for: Photosensitizer verteporfin inhibits the growth of YAP- and TAZ-dominant gastric cancer cells by suppressing the anti-apoptotic protein Survivin in a light-independent manner
Source: PubMed Central journal article supplement — Oncol Lett. 2021 Aug 3;22(4):703. doi: 10.3892/ol.2021.12964 (PMC8358589; doi:10.3892/ol.2021.12964), 2021-08-03

Figure S1. Characteristics of cell lines. (A) Western blots of YAP and TAZ in PANC-1, MKN-45 and MKN-74 cells. (B) CD31 in MKN-45 and MKN-74 cells, as shown by immunofluorescence. YAP, yes-associated protein; TAZ, transcriptional co-activator with a PDZ-binding domain.

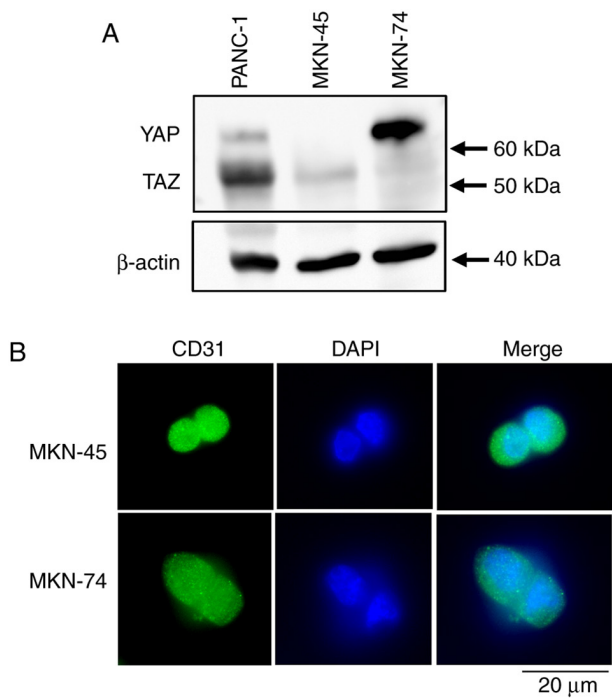

Supplement: Supplementary_Data.pdf [file Supplementary_Data.pdf]
